# Supplementary material for: Characteristics of Cellulose Nanofibrils from Transgenic Trees with Reduced Expression of Cellulose Synthase Interacting 1
Source: MDPI journal article supplement (doi:10.3390/nano12193448), 2022-10-02
Supplement: s1 [file s1]

# Characteristics of Cellulose Nanofibrils from Transgenic Trees with Reduced Expression of Cellulose Synthase Interacting 1

Simon Jonasson <sup>1</sup>, Anne Bänder <sup>2</sup>, Linn Berglund <sup>1</sup>, Totte Niittylä <sup>2</sup> and Kristiina Oksman <sup>1,3,4,\*</sup>

<sup>1</sup> Division of Materials Science, Luleå University of Technology, 97187 Luleå, Sweden

<sup>2</sup> Umeå Plant Science Centre, Department of Forest Genetics and Plant Physiology, Swedish University of Agricultural Sciences, 90183 Umeå, Sweden

<sup>3</sup> Mechanical & Industrial Engineering, University of Toronto, Toronto, ON M5S 3G8, Canada

<sup>4</sup> Wallenberg Wood Science Centre (WWSC), Luleå University of Technology, 97187 Luleå, Sweden

\* Correspondence: kristiina.oksman@ltu.se

**Table S1.** Chemical composition of wood cell wall [1].

| Tree ID | Total lignin<br>[%] | Hemicelluloses<br>[%] | Cellulose<br>[%] |
|---------|---------------------|-----------------------|------------------|
| WT      | 21.5 (±0.5)         | 21.4 (±1.0)           | 40.1 (±0.7)      |
| T1      | 20.2 (±0.5)         | 19.2 (±1.1)           | 37.1 (±0.3)      |
| T2      | 20.5 (±1.1)         | 20.3 (±1.5)           | 40.4 (±1.0)      |

## Reference

1. Bänder, A.; Sundman, O.; Mahboubi, A.; Persson, S.; Mansfield, S.D.; Rüggeberg, M.; Niittylä, T. Cellulose synthase interacting 1 is required for wood mechanics and leaf morphology in aspen. *Plant J.* **2020**, *103*, 1858–1868. <https://doi.org/10.1111/tpj.14873>.
